# Supplementary material for: Electronic structure of small band gap oligomers based on cyclopentadithiophenes and acceptor units
Source: Royal Society of Chemistry journal article supplement (doi:10.1039/b901374a), 2009-01-01
Supplement: b901374a.pdf [file b901374a.pdf]

## ***Supporting Information***

### **Electronic structure of small band gap oligomers**

#### **based on cyclopentadithiophenes and acceptor units**

Bram P. Karsten,<sup>†</sup> Johannes C. Bijleveld,<sup>†</sup> Lucas Viani,<sup>‡</sup> Jérôme Cornil, Johannes  
Gierschner<sup>‡,§</sup> and René A. J. Janssen<sup>†</sup>

*Laboratory of Macromolecular and Organic Chemistry, Eindhoven University of Technology,  
P.O. Box 513, NL-5600 MB Eindhoven, The Netherlands; Laboratory for Chemistry of Novel  
Materials, University of Mons-Hainaut, Place du Parc 20, B-7000 Mons, Belgium; Madrid  
Institute of Advanced Studies (IMDEA-Nanoscience) UAM, Faculty of Science Module C-IX,  
3rd Level, Av. Tomás y Valiente, 7 Campus Cantoblanco, E-28049 Madrid, Spain.*

E-mail: r.a.j.janssen@tue.nl

---

<sup>†</sup> Eindhoven University of Technology

<sup>‡</sup> University of Mons-Hainaut

<sup>§</sup> Madrid Institute of Advanced Studies

## **Detailed synthetic procedures**

**General methods.**  $^1\text{H}$ -NMR and  $^{13}\text{C}$ -NMR spectra were recorded in  $\text{CDCl}_3$  on a 400 MHz NMR (Varian Mercury, 400 MHz for  $^1\text{H}$ -NMR and 100 MHz for  $^{13}\text{C}$ -NMR), chemical shifts are reported in ppm downfield from tetramethylsilane (TMS). IR spectra were recorded on a Perkin Elmer 1600 FT-IR. Matrix-assisted laser desorption ionization time-of-flight (MALDI-TOF) mass spectrometry has been performed on a PerSeptive Biosystems Voyager-DE PRO spectrometer. Recycling GPC was performed on a LC system equipped with JAIGEL 2H and JAIGEL 2.5H columns and a UV-detector, using a preparative flow cell (path length 0.5 mm). The eluent was chloroform at 3.5 mL/min, the injection volume was 2 mL. **Materials.** Solvents were purchased from Biosolve and used without further purification, unless stated otherwise. THF was distilled over 4 Å molsieves, pyridine was dried over 4 Å molsieves before use. Chemicals were purchased from Acros or Aldrich and used without purification. 4,4-bis(2-ethylhexyl)-4H-cyclopenta[2,1-b:3,4-b']dithiophene (**1**) and 2,5-dibromo-3,4-dinitrothiophene (**7**) were prepared following literature procedures.<sup>1,2</sup> Oxygen and moisture-sensitive reactions were performed under an argon atmosphere.

**2-(4,4,5,5-Tetramethyl-1,3,2-dioxaborolane-2-yl)-4,4-bis(2-ethylhexyl)-4H-cyclopenta[2,1-b:3,4-b']dithiophene (**2**).** This product was obtained as a by-product in the synthesis of 2,6-di-(4,4,5,5-tetramethyl-1,3,2-dioxaborolane-2-yl)-4,4-bis(2-ethylhexyl)-4H-cyclopenta[2,1-b:3,4-b']dithiophene, following a literature procedure. The title compound was separated from the main product by recycling GPC.  $^1\text{H}$ -NMR (400 MHz):  $\delta$  7.43 (m, 2H, Ar-H), 7.17 (m, 2H, Ar-H), 6.92, (m, 2H, Ar-H), 1.85 (m, 4H,  $-\text{CH}_2\text{CH}(\text{C}_2\text{H}_5)(\text{C}_4\text{H}_9)$ ), 1.35 (s, 12H,  $-\text{BO}_2\text{C}_2(\text{CH}_3)_4$ ), 0.85 (m, 18H, alkyl-H), 0.74 (m, 6H,  $-\text{CH}_3$ ), 0.58 (m, 6H,  $-\text{CH}_3$ ).  $^{13}\text{C}$ -NMR (100 MHz):  $\delta$  160.97, 144.07, 131.87, 83.97, 52.66, 43.20, 35.13, 33.80, 28.31,

27.43, 24.77, 22.77, 14.08, 10.57. MALDI-TOF-MS:  $m/z$  527.21 (20 %), 528.20 (100), 529.21 (35), 530.20 (15), 531.20 (5).

**2-(Tributylstannyl)-4,4-bis(2-ethylhexyl)-4H-cyclopenta[2,1-b:3,4-b']dithiophene**

**(3).** Compound **1** (215 mg, 0.53 mmol) was dissolved in THF (2 mL). At -78 °C, *n*-Butyllithium (0.215 mL, 2.5 M, 0.54 mmol) was added and the mixture was stirred at -78 °C for 2 h. Tributyltin chloride (0.145 mL, 0.53 mmol) was added and the mixture was stirred for 16 h, while warming to room temperature. Diethyl ether (15 mL) was added and the mixture was washed with water (3×5 mL), dried with MgSO<sub>4</sub> and the solvent was evaporated. Yield: 369 mg (> 99 %). <sup>1</sup>H-NMR (400 MHz):  $\delta$  7.05 (d, *J* = 4.8 Hz, 1H, Ar-*H*), 6.93-6.88 (m, 2H, Ar-*H*), 1.90-1.82 (m, 4H, -CH<sub>2</sub>CH(C<sub>2</sub>H<sub>5</sub>)(C<sub>4</sub>H<sub>9</sub>)), 1.63-1.52 (m, 6H, -CH<sub>2</sub>C<sub>3</sub>H<sub>7</sub>), 1.40-1.30 (m, 6H, -CH<sub>2</sub>CH<sub>2</sub>C<sub>2</sub>H<sub>5</sub>), 1.13-1.06 (m, 6p, -C<sub>2</sub>H<sub>4</sub>CH<sub>2</sub>CH<sub>3</sub>), 1.06-0.82 (m, 27H, alkyl-*H*), 0.75 (t, *J* = 6.7 Hz, 6H, -CH<sub>3</sub>), 0.58 (t, *J* = 7.6 Hz, 6H, -CH<sub>3</sub>)

**5,8-Dibromoquinoxaline (4).** 2,3-Diamino-1,4-dibromobenzene (2.45 g, 0.39 mmol) was dissolved in ethanol (30 mL). Glyoxal (1.5 mL, 40 wt. % solution in water) and two drops of dry triethylamine were added. The mixture was stirred at room temperature overnight. The white crystals that had formed were filtered off and recrystallized from ethanol to give white needles. Yield: 0.76 g (76%). <sup>1</sup>H-NMR (400 MHz):  $\delta$  9.01 (s, 2H, Ar-*H*), 8.00 (s, 2H, Ar-*H*). <sup>13</sup>C-NMR (100 MHz):  $\delta$  146.03, 141.56, 133.72, 123.97.

**4,7-Dibromo-2,1,3-benzothiadiazole (5).** 2,1,3-Benzothiadiazole (10.18 g, 79.3 mmol) was dissolved in aqueous HBr (48 wt. %, 100 mL). At 150 °C, bromine (12 mL, 233 mmol) was added slowly. This mixture was stirred at 150 °C for 2 h and reaction mixture was cooled to room temperature. The mixture was filtered over a Büchner funnel; solids were washed extensively with water. Solids were dissolved in diethyl ether (1 L) and the mixture was washed with water and saturated NaCl. The solvent was evaporated and the product was

recrystallized from methanol to give off-white needles. Yield: 17.18 g (78 %).  $^1\text{H}$ -NMR (400 MHz):  $\delta$  7.72 (s, 2H, Ar-*H*)  $^{13}\text{C}$ -NMR (100 MHz):  $\delta$  152.96, 132.31, 113.87.

**4,7-Dibromo-2,1,3-benzoxadiazole (6).** To a melt of 2,1,3-benzoxadiazole (8.46 g, 40.4 mmol) with iron dust (93 mg, 1.6 mmol), bromine (15.2 g, 95 mmol) was added dropwise. The mixture was stirred at 90 °C for 2 h and the mixture was poured into water. A solution of sodium bisulfite was added until no gas evolution was observed. Solids were filtered, impregnated on silica and purified by column chromatography on silica, using heptane as the eluent. The product was recrystallized from ethanol to give yellow crystals. Yield: 8.40 g (75 %).  $^1\text{H}$ -NMR (400 MHz):  $\delta$  7.51 (s, 2H, Ar-*H*).  $^{13}\text{C}$ -NMR (100 MHz):  $\delta$  149.38, 134.17, 108.70.

**5,8-Di(4,4-bis(2-ethylhexyl)-4H-cyclopenta[2,1-b:3,4-b']dithiophene-2-yl)quinoxaline (Q).** To a mixture of compound **2** (36 mg, 68  $\mu\text{mol}$ ), 5,8-dibromoquinoxaline (**4**) (8 mg, 28  $\mu\text{mol}$ ), Aliquat 336 (one drop) and degassed aqueous 2M  $\text{K}_2\text{CO}_3$  (0.3 mL) in degassed toluene (3 mL), a few grains of tetrakis(triphenylphosphine)palladium were added. The mixture was stirred overnight at 120 °C. Heptane (10 mL) was added and the mixture was washed with water. The product was purified by column chromatography on silica, using ethyl acetate/heptane as the eluent. Yield: 10 mg (16%).  $^1\text{H}$ -NMR (400 MHz):  $\delta$  8.98 (s, 2H, Ar-*H*), 8.11 (s, 2H, Ar-*H*), 7.72 (s, 2H, Ar-*H*), 7.18 (m, 2H, Ar-*H*), 6.97 (m, 2H, Ar-*H*), 1.90 (m, 8H,  $-\text{CH}_2\text{CH}(\text{C}_2\text{H}_5)(\text{C}_4\text{H}_9)$ ), 0.95 (m, 36H, alkyl-*H*), 0.76, (m, 12H,  $-\text{CH}_3$ ), 0.64 (m, 12H,  $-\text{CH}_3$ ).  $^{13}\text{C}$ -NMR (100 MHz):  $\delta$  157.85, 157.10, 142.81, 139.60, 137.36, 131.90, 126.28, 124.83, 122.33, 122.29, 121.50, 121.42, 53.48, 53.41, 43.25, 35.10, 35.07, 34.22, 29.68, 28.62, 28.56, 28.05, 27.41, 27.33, 22.79, 22.76, 22.68, 14.07, 10.72, 10.60. IR:  $\nu_{\text{max}}/\text{cm}^{-1}$  2955, 2921, 2870, 2855, 1731, 1661, 1567, 1504, 1458, 1428, 1406, 1377, 1321, 1275, 1078,

939, 891, 861, 828, 798, 725, 708, 658. MALDI-TOF-MS:  $m/z$  930.65 (100 %), 931.65 (70), 932.65 (40), 933.65 (15), 934.65 (5).

**4,7-Di(4,4-bis(2-ethylhexyl)-4H-cyclopenta[2,1-b:3,4-b']dithiophene-2-yl)-2,1,3-benzothiadiazole (BT).** This compound was prepared following the same procedure as for **Q**, using compound **2** (325 mg, 0.61 mmol) and 4,7-dibromo-2,1,3-benzothiadiazole (**5**) (90 mg, 0.30 mmol). Yield: 71 mg (25 %).  $^1\text{H}$ -NMR (400 MHz):  $\delta$  8.05 (m, 2H, Ar-*H*), 7.82 (m, 2H, Ar-*H*), 7.19 (m, 2H, Ar-*H*), 6.97 (m, 2H, Ar-*H*), 1.97 (m, 8H,  $-\text{CH}_2\text{CH}(\text{C}_2\text{H}_5)(\text{C}_4\text{H}_9)$ ), 0.95 (m, 36H, alkyl-*H*), 0.75 (m, 12H,  $-\text{CH}_3$ ), 0.63 (m, 12H,  $-\text{CH}_3$ ).  $^{13}\text{C}$ -NMR: (100 MHz)  $\delta$  158.55, 158.29, 152.53, 139.04, 138.73, 136.97, 126.04, 125.23, 124.15, 53.72, 43.27, 43.16, 35.16, 35.13, 34.18, 29.70, 28.63, 28.53, 27.45, 27.33, 22.77, 14.12, 14.08, 14.04, 10.76, 10.63. IR:  $\nu_{\text{max}}/\text{cm}^{-1}$  2955, 2921, 2854, 1668, 1574, 1563, 1533, 1505, 1478, 1458, 1428, 1397, 1377, 1339, 1269, 1181, 1082, 885, 859, 826, 798, 708, 659. MALDI-TOF-MS:  $m/z$  936.23 (100 %), 937.24 (70), 938.23 (45), 939.23 (20), 940.23 (5).

**4,7-Di(4,4-bis(2-ethylhexyl)-4H-cyclopenta[2,1-b:3,4-b']dithiophene-2-yl)-2,1,3-benzoxadiazole (BO).** This compound was prepared following the same procedure as for **Q**, using compound **2** (32 mg, 61  $\mu\text{mol}$ ) and 4,7-dibromo-2,1,3-benzoxadiazole (**6**) (8 mg, 29  $\mu\text{mol}$ ). Yield: 20 mg (72 %).  $^1\text{H}$ -NMR (400 MHz):  $\delta$  8.05 (s, 2H, Ar-*H*), 7.53 (s, 2H, Ar-*H*), 7.22 (m, 2H, Ar-*H*), 6.98 (m, 2H, Ar-*H*), 1.96 (m, 8H,  $-\text{CH}_2\text{CH}(\text{C}_2\text{H}_5)(\text{C}_4\text{H}_9)$ ), 0.90 (m, 36H, alkyl-*H*), 0.75 (m, 12H,  $-\text{CH}_3$ ), 0.63 (m, 12H,  $-\text{CH}_3$ ).  $^{13}\text{C}$ -NMR (100 MHz):  $\delta$  159.19, 158.95, 147.86, 138.61, 137.59, 136.57, 125.89, 124.46, 124.07, 122.48, 121.88, 53.88, 43.18, 43.14, 43.05, 35.17, 34.15, 28.61, 28.50, 27.43, 27.31, 22.75, 14.05, 13.95, 13.91, 10.74, 10.60. IR:  $\nu_{\text{max}}/\text{cm}^{-1}$  2956, 2921, 2855, 1668, 1591, 1531, 1459, 1425, 1407, 1378, 1326, 1261, 1188, 1113, 1079, 1015, 895, 873, 832, 799, 709, 661. MALDI-TOF-MS:  $m/z$  920.46 (100 %), 921.46 (70), 922.46 (40), 923.45 (15).

**2,5-Di(4,4-bis(2-ethylhexyl)-4H-cyclopenta[2,1-b:3,4-b']dithiophene-2-yl)-3,4-dinitrothiophene (8).** compound **3** (396 mg, 0.53 mmol) and 2,5-dibromo-3,4-dinitrothiophene (**7**) were dissolved in THF (2 mL). Bis(triphenylphosphine)palladium(II) dichloride (9 mg, 13  $\mu$ mol) was added and the mixture was stirred at 70 °C for 2 h. The solvent was evaporated and the crude product was purified by flash chromatography on silica, using ethyl acetate/heptane as the eluent. Yield: 234 mg (94 %).  $^1\text{H-NMR}$  (400 MHz):  $\delta$  7.24 (t,  $J$  = 1.8 Hz, 2H, Ar-*H*), 7.31 (d,  $J$  = 4.9 Hz, 2H, Ar-*H*), 6.98 (m, 2H, Ar-*H*), 1.99-1.86 (m, 8H,  $-\text{CH}_2\text{CH}(\text{C}_2\text{H}_5)(\text{C}_4\text{H}_9)$ ), 1.44-1.31 (m, 4H,  $-\text{CH}_2\text{CH}(\text{C}_2\text{H}_5)(\text{C}_4\text{H}_9)$ ), 1.10-0.82 (m, 32H, alkyl-*H*), 0.80-0.73 (m, 12H,  $-\text{CH}_3$ ), 0.66-0.54 (m, 12H,  $-\text{CH}_3$ ).  $^{13}\text{C-NMR}$  (100 MHz):  $\delta$  160.18, 158.41, 143.95, 135.78, 134.65, 127.87, 126.79, 126.08, 125.98, 122.50, 54.06, 43.10, 35.16, 34.27, 34.16, 28.61, 28.57, 28.27, 27.38, 27.28, 26.76, 22.79, 22.71, 17.28, 14.09, 14.04, 13.57, 10.63. IR:  $\nu_{\text{max}}/\text{cm}^{-1}$  2956, 2922, 2871, 2855, 1546, 1459, 1425, 1376, 1308, 1181, 733, 709, 664. MALDI-TOF-MS:  $m/z$  974.23 (100 %), 975.23 (65), 976.23 (40), 977.22 (20), 978.22 (10).

**2,5-Di(4,4-bis(2-ethylhexyl)-4H-cyclopenta[2,1-b:3,4-b']dithiophene-2-yl)-3,4-diaminothiophene (9).** compound **8** (234 mg, 0.24 mmol) and tin(II) chloride (650 mg, 2.9 mmol) were dissolved in ethyl acetate (5 mL). The mixture was stirred at reflux for 2 h, cooled to room temperature and added to  $\text{Na}_2\text{CO}_3$  (0.25 M, 20 mL). Dichloromethane (20 mL) was added, the mixture was stirred vigorously and filtered over celite. Phases were separated and the organic phase was washed with water (3 $\times$ 30 mL), dried with  $\text{MgSO}_4$  and the solvent was evaporated. Yield: 220 mg (>99 %).  $^1\text{H-NMR}$  (400 MHz):  $\delta$  7.12 (d,  $J$  = 4.8 Hz, 2H, Ar-*H*), 6.97-6.91 (m, 4H, Ar-*H*), 3.73 (s, 4H,  $-\text{NH}_2$ ), 1.95-1.82 (m, 8H,  $-\text{CH}_2\text{CH}(\text{C}_2\text{H}_5)(\text{C}_4\text{H}_9)$ ), 1.41-1.22 (m, 4H,  $-\text{CH}_2\text{CH}(\text{C}_2\text{H}_5)(\text{C}_4\text{H}_9)$ ), 1.14-0.83 (m, 32H, alkyl-*H*), 0.83-0.71 (m, 12H,  $-\text{CH}_3$ ), 0.71-0.56 (m, 12H,  $-\text{CH}_3$ ).  $^{13}\text{C-NMR}$  (100 MHz):  $\delta$  158.03,

157.17, 136.77, 135.76, 134.93, 133.12, 124.27, 122.29, 119.28, 111.36, 53.64, 43.21, 35.07, 35.04, 34.22, 34.19, 28.68, 28.59, 27.82, 27.33, 22.81, 22.74, 14.09, 14.06, 10.71, 10.64. IR:  $\nu_{\text{max}}/\text{cm}^{-1}$  2956, 2922, 2871, 2855, 1613, 1457, 1377, 906, 732. MALDI-TOF-MS:  $m/z$  914.37 (100 %), 915.37 (65), 916.36 (45), 917.36 (20), 918.36 (5).

**5,7-Di(4,4-bis(2-ethylhexyl)-4H-cyclopenta[2,1-b:3,4-b']dithiophene-2-yl)thieno[3,4-b]pyrazine (TP-a).** Compound **9** (110 mg, 0.12 mmol) was dissolved in ethanol (3 mL). Glyoxal (40 %, 0.1 mL) was added and the mixture was stirred at reflux for 2 h. The solvent was evaporated and the product was purified by flash chromatography on silica, using ethyl acetate/heptane and dichloromethane/heptane as the eluents. The product was further purified by recycling GPC. Yield: 59 mg (52 %).  $^1\text{H-NMR}$  (400 MHz):  $\delta$  8.47 (s, 2H, Ar-*H*), 7.43 (m, 2H, Ar-*H*), 7.18 (m, 2H, Ar-*H*), 6.95 (m, 2H, Ar-*H*), 2.00-1.85 (m, 8H, -CH<sub>2</sub>CH(C<sub>2</sub>H<sub>5</sub>)(C<sub>4</sub>H<sub>9</sub>)), 1.10-0.85 (m, 36H, alkyl-*H*), 0.80-0.58 (m, 24H, -CH<sub>3</sub>).  $^{13}\text{C-NMR}$  (100 MHz):  $\delta$  158.10, 158.79, 143.70, 139.31, 139.02, 136.95, 133.74, 125.56, 125.21, 122.35, 119.44, 53.55, 43.31, 43.25, 43.16, 35.13, 34.18, 28.62, 28.55, 28.33, 27.42, 27.33, 22.82, 22.79, 22.75, 14.07, 10.73, 10.60, 10.57, 43.36. IR:  $\nu_{\text{max}}/\text{cm}^{-1}$  2955, 2919, 2870, 2854, 1509, 1457, 1406, 1377, 1179, 1113, 1020, 974, 891, 852, 797, 706. MALDI-TOF-MS:  $m/z$  936.36 (100 %), 937.36 (70), 938.36 (45), 939.35 (20), 940.35 (5).

**8,10-Di(4,4-bis(2-ethylhexyl)-4H-cyclopenta[2,1-b:3,4-b']dithiophene-2-yl)acenaphtho[1,2-e]thieno[3,4-b]pyrazine (TP-b).** compound **9** (110 mg, 0.12 mmol) and acenaphthenequinone (33 mg, 0.18 mmol) were dissolved in ethanol (3 mL) and the mixture was stirred at reflux for 16 h. The solvent was evaporated and the product was purified by flash chromatography on silica, using ethyl acetate/heptane and dichloromethane/heptane as the eluents. Yield: 66 mg (52 %).  $^1\text{H-NMR}$  (400 MHz):  $\delta$  8.41 (d,  $J = 6.9$  Hz, 2H, Ar-*H*), 8.08 (d,  $J = 8.2$  Hz, 2H, Ar-*H*), 7.85 (t,  $J = 7.4$  Hz, 2H, Ar-*H*), 7.49 (s, 2H, Ar-*H*), 7.20 (s, 2H, Ar-

*H*), 6.98 (s, 2H, Ar-*H*), 2.04-1.87 (m, 8H, -CH<sub>2</sub>CH(C<sub>2</sub>H<sub>5</sub>)(C<sub>4</sub>H<sub>9</sub>)), 1.10-0.85 (m, 36H, alkyl-*H*), 0.82-0.60 (m, 24H, -CH<sub>3</sub>). <sup>13</sup>C-NMR (100 MHz):  $\delta$  158.01, 157.60, 153.14, 139.48, 138.16, 137.64, 137.26, 134.59, 131.51, 130.04, 128.77, 128.44, 125.58, 124.94, 122.38, 121.08, 119.11, 53.49, 43.41, 43.30, 35.17, 34.26, 34.21, 29.70, 28.68, 28.62, 28.59, 27.41, 22.92, 22.88, 22.82, 22.69, 14.15, 14.12, 10.77, 10.70, 10.67. IR:  $\nu_{\max}/\text{cm}^{-1}$  2955, 2919, 2870, 2854, 1458, 1418, 1377, 1282, 1214, 1176, 1115, 1078, 1033, 891, 823, 798, 769, 706. MALDI-TOF-MS: *m/z* 1060.45 (100 %), 1061.45 (75), 1062.45 (50), 1063.45 (25), 1064.45 (10).

**4,6-Di(4,4-bis(2-ethylhexyl)-4H-cyclopenta[2,1-b:3,4-b']dithiophene-2-yl)thieno[3,4-c][1,2,5]thiadiazole (TT).** Compound **9** (89 mg, 0.10 mmol) was dissolved in pyridine (3 mL). *N*-thionylaniline (0.03 mL, 0.26 mmol) and chlorotrimethylsilane (0.03 mL, 0.23 mmol) were added and the mixture was stirred for 16 h at 80 °C. The solvent was evaporated and the mixture was purified by flash chromatography on silica, using ethyl acetate/heptane and dichloromethane/heptane as the eluents. The product was further purified by recycling GPC. Yield: 33 mg (36 %). <sup>1</sup>H-NMR (400 MHz):  $\delta$  7.41 (t, *J* = 4.8 Hz, 2H, Ar-*H*), 7.18 (d, *J* = 4.8 Hz, 2H, Ar-*H*), 6.95 (m, 2H, Ar-*H*), 1.98-1.85 (m, 8H, -CH<sub>2</sub>CH(C<sub>2</sub>H<sub>5</sub>)(C<sub>4</sub>H<sub>9</sub>)), 1.10-0.85 (m, 36H, alkyl-*H*), 0.79-0.58 (m, 24H, -CH<sub>3</sub>). <sup>13</sup>C-NMR (100 MHz):  $\delta$  159.16, 158.18, 156.29, 137.50, 136.84, 135.11, 125.33, 122.41, 118.91, 112.14, 53.67, 43.31, 43.20, 43.16, 35.17, 34.15, 28.62, 28.53, 27.39, 27.33, 22.80, 22.77, 14.07, 10.73, 10.61. IR:  $\nu_{\max}/\text{cm}^{-1}$  2955, 2918, 2870, 2854, 1504, 1480, 1457, 1398, 1377, 1181, 829, 797, 706. MALDI-TOF-MS: *m/z* 942.19 (100 %), 943.19 (70), 944.19 (50), 945.19 (20), 946.18 (10).



- <sup>1</sup>. D. D. Kenning, K. A. Mitchell, T. R. Calhoun, M. R. Funfar, D. J. Sattler, and S. C. Rasmussen, *J. Org. Chem.*, 2002, **67**, 9073.
- <sup>2</sup>. *US Pat.*, 20070014939, 2007.
